# Supplementary material for: Efficacy and Safety of Ginkgo Diterpene Lactone Meglumine in Acute Ischemic Stroke: A Randomized Clinical Trial
Source: PubMed Central journal article supplement (PMC10425831; doi:10.1001/jamanetworkopen.2023.28828), 2023-08-14
Supplement: jamanetwopen-e2328828-s003.pdf [file jamanetwopen-e2328828-s003.pdf]

\*First name, last name, and suffix (if applicable) are required and will appear in PubMed.

| <b>*Group Name(s): GDLM group</b>        |                   |                              |                  |                                                                                     |                                          |                                                         |                                                                                            |
|------------------------------------------|-------------------|------------------------------|------------------|-------------------------------------------------------------------------------------|------------------------------------------|---------------------------------------------------------|--------------------------------------------------------------------------------------------|
| <b>*First Name and Middle Initial(s)</b> | <b>*Last Name</b> | <b>*Suffix (eg, Jr, III)</b> | Academic Degrees | Institution                                                                         | Location (city, state/province, country) | Role or Contribution, eg, chair, principal investigator | Group (if more than 1 Group listed in the byline) and/or Subgroup (eg, Steering Committee) |
| Yongjun                                  | Wang              |                              |                  | Beijing Tiantan Hospital                                                            |                                          | Steering Committee, Executive Committee                 |                                                                                            |
| Maolin                                   | He                |                              |                  |                                                                                     |                                          | Steering Committee                                      |                                                                                            |
| Qiang                                    | Dong              |                              |                  |                                                                                     |                                          | Steering Committee                                      |                                                                                            |
| Gang                                     | Zhao              |                              |                  |                                                                                     |                                          | Steering Committee                                      |                                                                                            |
| Kangning                                 | Chen              |                              |                  |                                                                                     |                                          | Steering Committee                                      |                                                                                            |
| Peng                                     | Xie               |                              |                  |                                                                                     |                                          | Steering Committee                                      |                                                                                            |
| Yun                                      | Xu                |                              |                  |                                                                                     |                                          | Steering Committee                                      |                                                                                            |
| Yi                                       | Yang              |                              |                  |                                                                                     |                                          | Steering Committee                                      |                                                                                            |
| Li                                       | Guo               |                              |                  |                                                                                     |                                          | Steering Committee                                      |                                                                                            |
| Yansheng                                 | Li                |                              |                  |                                                                                     |                                          | Steering Committee                                      |                                                                                            |
| Yilong                                   | Wang              |                              |                  |                                                                                     |                                          | Executive Committee                                     |                                                                                            |
| Xiaoli                                   | Zhang             |                              |                  |                                                                                     |                                          | Statistical and Data Management Center                  |                                                                                            |
| Anding                                   | Xu                |                              |                  |                                                                                     |                                          | Clinical Event Adjudication Committee                   |                                                                                            |
| Yansheng                                 | Li                |                              |                  |                                                                                     |                                          | Clinical Event Adjudication Committee                   |                                                                                            |
| Xudong                                   | Pan               |                              |                  |                                                                                     |                                          | Clinical Event Adjudication Committee                   |                                                                                            |
| Cuilan                                   | Xiao              |                              |                  |                                                                                     |                                          | Independent Medical Monitor                             |                                                                                            |
| David                                    | Wang              |                              |                  |                                                                                     |                                          | Data and Safety Monitoring Board                        |                                                                                            |
| Hao                                      | Li                |                              |                  |                                                                                     |                                          | Data and Safety Monitoring Board                        |                                                                                            |
| Ying                                     | Gao               |                              |                  |                                                                                     |                                          | Data and Safety Monitoring Board                        |                                                                                            |
| Jielai                                   | Xia               |                              |                  |                                                                                     |                                          | Independent Statistician                                |                                                                                            |
| Hongjian                                 | Zhao              |                              |                  | Affiliated Hospital of Chengdu University                                           |                                          | Data collection                                         |                                                                                            |
| Huijuan                                  | Wang              |                              |                  | Affiliated Hospital of Chengdu University                                           |                                          | Data collection                                         |                                                                                            |
| Yue                                      | He                |                              |                  | Affiliated Hospital of Jiangsu University                                           |                                          | Data collection                                         |                                                                                            |
| Weili                                    | Li                |                              |                  | Affiliated Hospital of Weifang Medical College                                      |                                          | Data collection                                         |                                                                                            |
| Xiangyang                                | Wei               |                              |                  | Affiliated Hospital of Logistics University of Chinese People's Armed Police Forces |                                          | Data collection                                         |                                                                                            |
| Junqing                                  | Bai               |                              |                  | Anshan Cancer Hospital                                                              |                                          | Data collection                                         |                                                                                            |
| Shiwei                                   | Cao               |                              |                  | Anshan Central Hospital                                                             |                                          | Data collection                                         |                                                                                            |
| Ying                                     | Song              |                              |                  | Baoding First Hospital                                                              |                                          | Data collection                                         |                                                                                            |
| Zhanhu                                   | Ma                |                              |                  | Baoding First Hospital                                                              |                                          | Data collection                                         |                                                                                            |
| Na                                       | Zhang             |                              |                  | Central Hospital Affiliated to Shenyang Medical College                             |                                          | Data collection                                         |                                                                                            |
| Nianzhen                                 | Yin               |                              |                  | Chenzhou First People's Hospital                                                    |                                          | Data collection                                         |                                                                                            |
| Long                                     | Zeng              |                              |                  | Chenzhou First People's Hospital                                                    |                                          | Data collection                                         |                                                                                            |
| Likun                                    | Zhang             |                              |                  | Daqing People's Hospital                                                            |                                          | Data collection                                         |                                                                                            |
| Fang                                     | Yang              |                              |                  | Emergency General Hospital                                                          |                                          | Data collection                                         |                                                                                            |

## Supplemental Online Content: Nonauthor Collaborators

\*First name, last name, and suffix (if applicable) are required and will appear in PubMed.

| *First Name and Middle Initial(s) | *Last Name | *Suffix (eg, Jr, III) | Academic Degrees | Institution                                                                             | Location (city, state/province, country) | Role or Contribution, eg, chair, principal investigator | Group (if more than 1 Group listed in the byline) and/or Subgroup (eg, Steering Committee) |
|-----------------------------------|------------|-----------------------|------------------|-----------------------------------------------------------------------------------------|------------------------------------------|---------------------------------------------------------|--------------------------------------------------------------------------------------------|
| Jing                              | Zhang      |                       |                  | General Hospital of Hegang Mining Group                                                 |                                          | Data collection                                         |                                                                                            |
| Jian                              | Wang       |                       |                  | Guangdong Provincial People's Hospital<br>Ganzhou Hospital (Ganzhou Municipal Hospital) |                                          | Data collection                                         |                                                                                            |
| Huili                             | Tang       |                       |                  | Guihang Guiyang Hospital                                                                |                                          | Data collection                                         |                                                                                            |
| Yinghua                           | Li         |                       |                  | Guizhou Aerospace Hospital                                                              |                                          | Data collection                                         |                                                                                            |
| Hourong                           | Zhou       |                       |                  | Guizhou Provincial People's Hospital                                                    |                                          | Data collection                                         |                                                                                            |
| Haisong                           | Feng       |                       |                  | Hanyang Hospital Affiliated to Wuhan University of Science and Technology               |                                          | Data collection                                         |                                                                                            |
| Dongjing                          | Song       |                       |                  | Harbin Second Hospital                                                                  |                                          | Data collection                                         |                                                                                            |
| Jianyu                            | Wang       |                       |                  | Harrison International Peace Hospital                                                   |                                          | Data collection                                         |                                                                                            |
| Yongcui                           | Ma         |                       |                  | Hegang People's Hospital                                                                |                                          | Data collection                                         |                                                                                            |
| Lihui                             | Chen       |                       |                  | Heilongjiang Nongken General Hospital                                                   |                                          | Data collection                                         |                                                                                            |
| Kaiwen                            | Xiao       |                       |                  | Hengyang First People's Hospital                                                        |                                          | Data collection                                         |                                                                                            |
| Qijin                             | Zhai       |                       |                  | Huaian First People's Hospital                                                          |                                          | Data collection                                         |                                                                                            |
| Jing                              | Li         |                       |                  | Huainan First People's Hospital                                                         |                                          | Data collection                                         |                                                                                            |
| Xiaojie                           | Li         |                       |                  | Inner Mongolia Baogang Hospital                                                         |                                          | Data collection                                         |                                                                                            |
| Yinqiao                           | Yang       |                       |                  | Jingmen No. 2 People's Hospital                                                         |                                          | Data collection                                         |                                                                                            |
| Xue                               | Mei        |                       |                  | Jining First People's Hospital                                                          |                                          | Data collection                                         |                                                                                            |
| Ziyun                             | Zhu        |                       |                  | Jiujiang People's Hospital                                                              |                                          | Data collection                                         |                                                                                            |
| Yan                               | Zhang      |                       |                  | Kaifeng Central Hospital                                                                |                                          | Data collection                                         |                                                                                            |
| Yuhu                              | Liu        |                       |                  | Lanzhou University Second Hospital                                                      |                                          | Data collection                                         |                                                                                            |
| Hongxia                           | Nie        |                       |                  | Lianyungang Second People's Hospital                                                    |                                          | Data collection                                         |                                                                                            |
| Bing                              | Fu         |                       |                  | Lianyungang Second People's Hospital                                                    |                                          | Data collection                                         |                                                                                            |
| Gang                              | Huang      |                       |                  | Luohe Central Hospital                                                                  |                                          | Data collection                                         |                                                                                            |
| Guoli                             | Zeng       |                       |                  | Luzhou People's Hospital                                                                |                                          | Data collection                                         |                                                                                            |
| Bingrong                          | Liu        |                       |                  | Maanshan Central Hospital                                                               |                                          | Data collection                                         |                                                                                            |
| Wang                              | Xiaomin    |                       |                  | Nanshi Hospital of Nanyang                                                              |                                          | Data collection                                         |                                                                                            |
| Lianying                          | Xu         |                       |                  | Nanyang Second People's Hospital                                                        |                                          | Data collection                                         |                                                                                            |
| Fan                               | Zhang      |                       |                  | Nuclear Industry 215 Hospital of Shaanxi Province                                       |                                          | Data collection                                         |                                                                                            |
| Lan                               | Wang       |                       |                  | Qiqihar First Hospital                                                                  |                                          | Data collection                                         |                                                                                            |
| Wei                               | Han        |                       |                  | Red Cross Hospital of Heilongjiang Province                                             |                                          | Data collection                                         |                                                                                            |
| Shanshan                          | Meng       |                       |                  | Shangqiu First People's Hospital                                                        |                                          | Data collection                                         |                                                                                            |
| Chang'e                           | Xiao       |                       |                  | Shaoyang First People's Hospital                                                        |                                          | Data collection                                         |                                                                                            |
| Zhijie                            | Yang       |                       |                  | Shengli Oilfield Central Hospital                                                       |                                          | Data collection                                         |                                                                                            |
| Yanqing                           | Deng       |                       |                  | Shiyan Renmin Hospital                                                                  |                                          | Data collection                                         |                                                                                            |
| Hu                                | Ying       |                       |                  | Peking Universtiy Shougang Hospital                                                     |                                          | Data collection                                         |                                                                                            |

## Supplemental Online Content: Nonauthor Collaborators

\*First name, last name, and suffix (if applicable) are required and will appear in PubMed.

| *First Name and Middle Initial(s) | *Last Name | *Suffix (eg, Jr, III) | Academic Degrees | Institution                                                           | Location (city, state/province, country) | Role or Contribution, eg, chair, principal investigator | Group (if more than 1 Group listed in the byline) and/or Subgroup (eg, Steering Committee) |
|-----------------------------------|------------|-----------------------|------------------|-----------------------------------------------------------------------|------------------------------------------|---------------------------------------------------------|--------------------------------------------------------------------------------------------|
| Li                                | Tang       |                       |                  | Sichuan University West China Hospital                                |                                          | Data collection                                         |                                                                                            |
| Chunli                            | Jia        |                       |                  | Suihua First People's Hospital                                        |                                          | Data collection                                         |                                                                                            |
| Chunpeng                          | Li         |                       |                  | Suzhou Jiulong Hospital Affiliated to Shanghai Jiaotong University    |                                          | Data collection                                         |                                                                                            |
| Shihua                            | Liu        |                       |                  | Suzhou Municipal Hospital                                             |                                          | Data collection                                         |                                                                                            |
| Min                               | Han        |                       |                  | Taihe County People's Hospital                                        |                                          | Data collection                                         |                                                                                            |
| Yanhua                            | Zhang      |                       |                  | Taiyuan Central Hospital                                              |                                          | Data collection                                         |                                                                                            |
| Feifei                            | Peng       |                       |                  | Taizhou First People's Hospital                                       |                                          | Data collection                                         |                                                                                            |
| Jing                              | Zhao       |                       |                  | The 169th Hospital of the Chinese People's Liberation Army            |                                          | Data collection                                         |                                                                                            |
| Donghai                           | Qiao       |                       |                  | The 211th Hospital of the Chinese People's Liberation Army            |                                          | Data collection                                         |                                                                                            |
| Wenjing                           | Li         |                       |                  | The 401th Hospital of the Chinese People's Liberation Army            |                                          | Data collection                                         |                                                                                            |
| Shengnan                          | Cai        |                       |                  | The 463th Hospital of the Chinese People's Liberation Army            |                                          | Data collection                                         |                                                                                            |
| Qiuying                           | Song       |                       |                  | The Affiliated Hospital of Hangzhou Normal University                 |                                          | Data collection                                         |                                                                                            |
| Chenghua                          | Xiao       |                       |                  | The Affiliated Hospital of Xuzhou Medical University                  |                                          | Data collection                                         |                                                                                            |
| Ming                              | Chen       |                       |                  | The Fifth Affiliated Hospital of Xinjiang Medical University          |                                          | Data collection                                         |                                                                                            |
| Junjie                            | Lei        |                       |                  | The Fifth Affiliated Hospital, Sun Yat-sen University                 |                                          | Data collection                                         |                                                                                            |
| Aimin                             | Cai        |                       |                  | The First Affiliated Hospital of Jinzhou Medical University           |                                          | Data collection                                         |                                                                                            |
| Wenfang                           | Xu         |                       |                  | The First Affiliated Hospital of Bengbu Medical College               |                                          | Data collection                                         |                                                                                            |
| Jie                               | Cao        |                       |                  | The First Affiliated Hospital of Gannan Medical College               |                                          | Data collection                                         |                                                                                            |
| Xinxin                            | Liu        |                       |                  | The First Affiliated Hospital of Henan University                     |                                          | Data collection                                         |                                                                                            |
| Dong                              | Tan        |                       |                  | The First Affiliated Hospital of Hunan Medical College                |                                          | Data collection                                         |                                                                                            |
| Tao                               | Feng       |                       |                  | The First Affiliated Hospital of Nanyang Medical College              |                                          | Data collection                                         |                                                                                            |
| Feng                              | Lina       |                       |                  | The First Affiliated Hospital, School of Medicine, Shihezi University |                                          | Data collection                                         |                                                                                            |

## Supplemental Online Content: Nonauthor Collaborators

\*First name, last name, and suffix (if applicable) are required and will appear in PubMed.

| *First Name and Middle Initial(s) | *Last Name | *Suffix (eg, Jr, III) | Academic Degrees | Institution                                                                                       | Location (city, state/province, country) | Role or Contribution, eg, chair, principal investigator | Group (if more than 1 Group listed in the byline and/or Subgroup (eg, Steering Committee)) |
|-----------------------------------|------------|-----------------------|------------------|---------------------------------------------------------------------------------------------------|------------------------------------------|---------------------------------------------------------|--------------------------------------------------------------------------------------------|
| Hongjing                          | Yan        |                       |                  | The First Hospital of Handan City                                                                 |                                          | Data collection                                         |                                                                                            |
| Gulinazi                          |            |                       |                  | The First Hospital of Xinjiang Medical University                                                 |                                          | Data collection                                         |                                                                                            |
| Changxia                          | Liu        |                       |                  | The First People's Hospital of Yancheng City                                                      |                                          | Data collection                                         |                                                                                            |
| Yao                               | Wang       |                       |                  | The Fourth Hospital of Harbin Medical University                                                  |                                          | Data collection                                         |                                                                                            |
| Qinghua                           | Yang       |                       |                  | The Second Affiliated Hospital of Guizhou Medical University                                      |                                          | Data collection                                         |                                                                                            |
| Lin                               | Ji         |                       |                  | The Second Affiliated Hospital of Shandong University of Chinese Medicine                         |                                          | Data collection                                         |                                                                                            |
| Jing                              | Xu         |                       |                  | The Second Affiliated Hospital of Xuzhou Medical College                                          |                                          | Data collection                                         |                                                                                            |
| Liping                            | Chen       |                       |                  | The Second Hospital of Hebei Medical University                                                   |                                          | Data collection                                         |                                                                                            |
| Shuai                             | Chen       |                       |                  | The Second Hospital of Zhengzhou University                                                       |                                          | Data collection                                         |                                                                                            |
| Yanfeng                           | Song       |                       |                  | The Second People's Hospital of LiaoCheng                                                         |                                          | Data collection                                         |                                                                                            |
| Li                                | Mei        |                       |                  | The Second People's Hospital of Guiyang (Jinyang Hospital)                                        |                                          | Data collection                                         |                                                                                            |
| Sheng                             | Ouyang     |                       |                  | The Third Affiliated Hospital of Gansu University of Traditional Chinese Medicine, Gansu Province |                                          | Data collection                                         |                                                                                            |
| Jie                               | Li         |                       |                  | The Third Affiliated Hospital of Southern Medical University                                      |                                          | Data collection                                         |                                                                                            |
| Defu                              | Zhao       |                       |                  | The Third Hospital of Liaoning Medical College                                                    |                                          | Data collection                                         |                                                                                            |
| Zhaozuo                           | Dong       |                       |                  | Tianjin People's Hospital                                                                         |                                          | Data collection                                         |                                                                                            |
| Wei                               | Jin        |                       |                  | Tongling City People's Hospital                                                                   |                                          | Data collection                                         |                                                                                            |
| Guoxiang                          | Tang       |                       |                  | Tongling Municipal Hospital                                                                       |                                          | Data collection                                         |                                                                                            |
| Na                                | Geng       |                       |                  | Weihai Municipal Hospital                                                                         |                                          | Data collection                                         |                                                                                            |
| Hongxing                          | Cai        |                       |                  | Wuhu First People's Hospital                                                                      |                                          | Data collection                                         |                                                                                            |
| Zaewang                           | Li         |                       |                  | Wuxi People's Hospital                                                                            |                                          | Data collection                                         |                                                                                            |
| Yu                                | Chen       |                       |                  | Xiangyang Central Hospital                                                                        |                                          | Data collection                                         |                                                                                            |
| Li                                | Huang      |                       |                  | Xiangyang First People's Hospital Affiliated to                                                   |                                          | Data collection                                         |                                                                                            |
| Yuzhang                           | Zhang      |                       |                  | Yan'an University Xianyang Hospital                                                               |                                          | Data collection                                         |                                                                                            |
| Peng                              | Lei        |                       |                  | Yichang Central People's Hospital                                                                 |                                          | Data collection                                         |                                                                                            |
| Mingmin                           | Yan        |                       |                  | Yichang First People's Hospital                                                                   |                                          | Data collection                                         |                                                                                            |
| Xiaojing                          | Zhang      |                       |                  | Yuanping First People's Hospital                                                                  |                                          | Data collection                                         |                                                                                            |
| Yiqi                              | Wang       |                       |                  | Zhejiang Provincial People's Hospital                                                             |                                          | Data collection                                         |                                                                                            |

Supplemental Online Content: Nonauthor Collaborators

\*First name, last name, and suffix (if applicable) are required and will appear in PubMed.

| *First Name and Middle Initial(s) | *Last Name | *Suffix (eg, Jr, III) | Academic Degrees | Institution                       | Location (city, state/province, country) | Role or Contribution, eg, chair, principal investigator | Group (if more than 1 Group listed in the byline) and/or Subgroup (eg, Steering Committee) |
|-----------------------------------|------------|-----------------------|------------------|-----------------------------------|------------------------------------------|---------------------------------------------------------|--------------------------------------------------------------------------------------------|
| Hailing                           | Dou        |                       |                  | Zhengzhou Central Hospital        |                                          | Data collection                                         |                                                                                            |
| Kun                               | Wang       |                       |                  | Zhengzhou First People's Hospital |                                          | Data collection                                         |                                                                                            |
| Guangjun                          | Nie        |                       |                  | Zibo Central Hospital             |                                          | Data collection                                         |                                                                                            |
