# Supplementary material for: Efficacy and Safety of Ginkgo Diterpene Lactone Meglumine in Acute Ischemic Stroke: A Randomized Clinical Trial
Source: PubMed Central journal article supplement (PMC10425831; doi:10.1001/jamanetworkopen.2023.28828), 2023-08-14
Supplement: jamanetwopen-e2328828-s004.pdf [file jamanetwopen-e2328828-s004.pdf]

## **Data Sharing Statement**

Zhang. Efficacy and Safety of Ginkgo Diterpene Lactone Meglumine in Acute Ischemic Stroke. *JAMA Netw Open*. Published August 14, 2023. doi:10.1001/jamanetworkopen.2023.28828

### **Data**

**Data available:** No
